# Supplementary material
Source: PubMed Central journal article supplement (PMC6104827)
Supplement: joces-131-204321-s1.pdf [file joces-131-204321-s1.pdf]

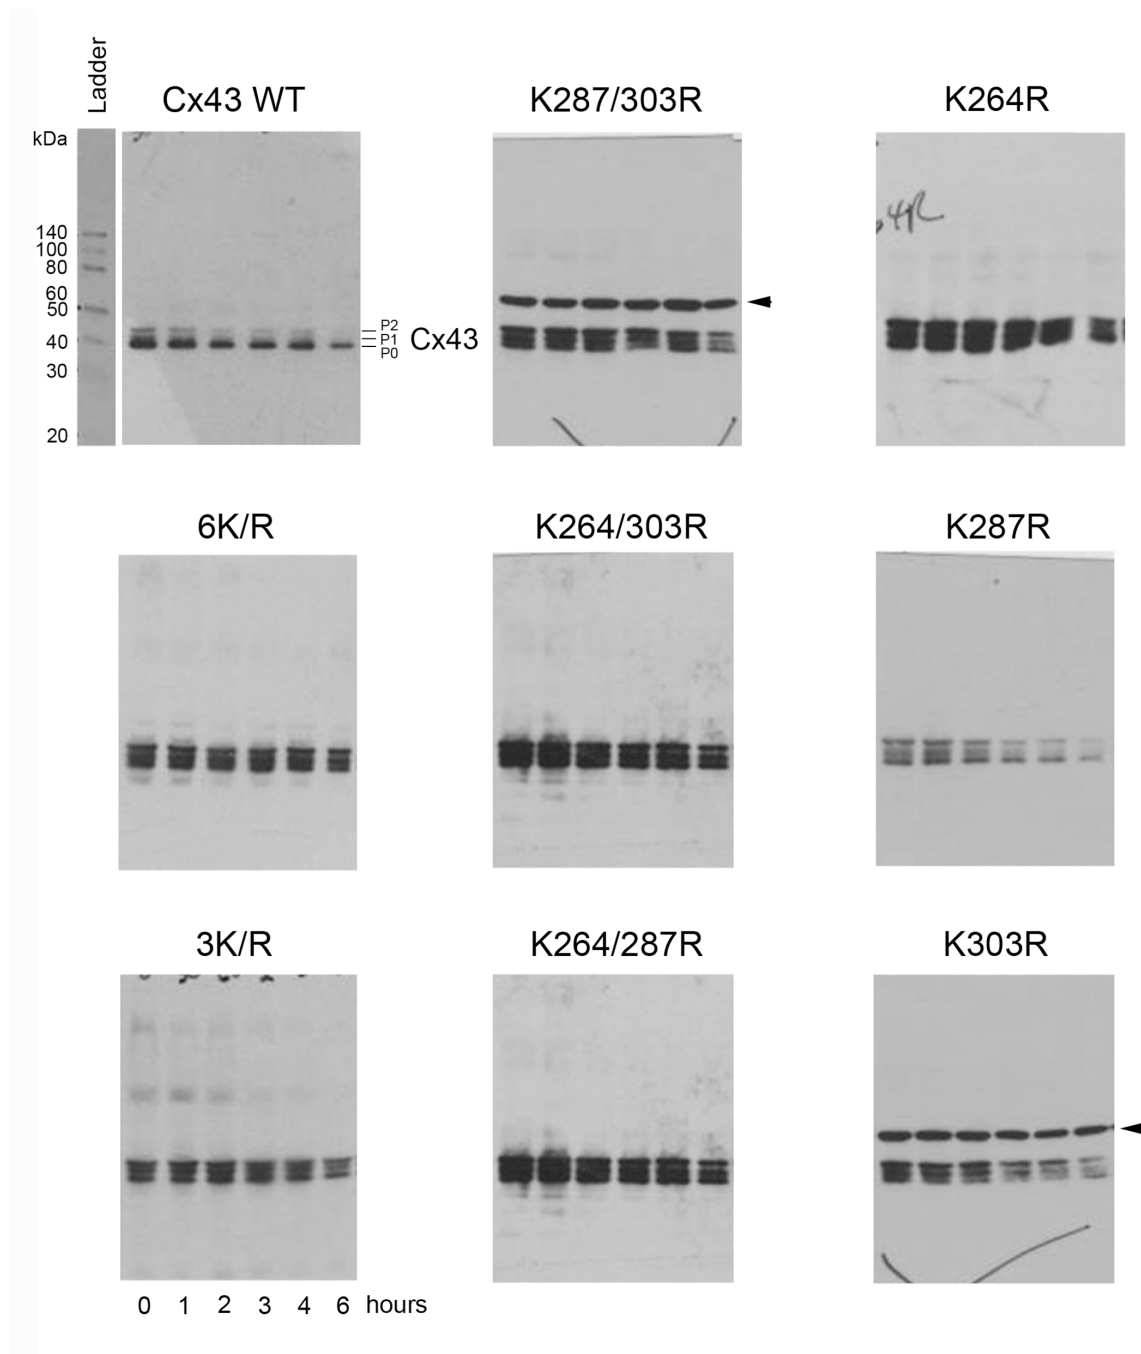

**Supplemental Figure 1: Cx43 K/R mutants with critical lysine residues mutated exhibit significantly extended protein half-lives.** The same blots as in Figure 4, however shown as uncropped blots. Ubiquitinated, higher-molecular weight species are not detected in these whole-cell lysates consistent with data presented in Figure 2. The origin and specificity of pronounced and distinct higher molecular weight bands detected sometimes but inconsistently in some blots (marked with arrowheads in the representative blots shown) is not clear.
